# Supplementary material for: The Glial Regenerative Response to Central Nervous System Injury Is Enabled by Pros-Notch and Pros-NFκB Feedback
Source: PubMed Central journal article supplement (PMC3166069; doi:10.1371/journal.pbio.1001133), 2011-08-30
Supplement: pbio.1001133.s016.pdf [file pbio.1001133.s016.pdf]

Table S1 Statistical analysis: sample sizes, tests and p values

| Examination                                                                                                                                                                                                                                                         |                 |                                               |                     |           |
|---------------------------------------------------------------------------------------------------------------------------------------------------------------------------------------------------------------------------------------------------------------------|-----------------|-----------------------------------------------|---------------------|-----------|
| Multiple comparison before pair-wise comparison                                                                                                                                                                                                                     |                 |                                               | TEST                | p VALUE   |
| TEST GENOTYPE                                                                                                                                                                                                                                                       | vs.             | CONTROL GENOTYPE                              | TEST                | p VALUE   |
| Number of abdominal PCNAGFP+ PROS+ EBONY+ IG - Injury                                                                                                                                                                                                               |                 |                                               |                     | Figure 4C |
| <i>PCNAGFP</i>                                                                                                                                                                                                                                                      | Stabbed (n=8)   | vs. not stabbed (n=9)                         | Mann-Whitney U-test | p=0.000   |
| % hemisegments with >1 EBONY+ vIG in abdomen - Injury                                                                                                                                                                                                               |                 |                                               |                     | Figure 4F |
| <i>yw</i>                                                                                                                                                                                                                                                           | Stabbed (n=336) | vs. not stabbed (n=320)                       | Fisher's exact test | p=0.047   |
| Number of abdominal REPO+ glia - Injury                                                                                                                                                                                                                             |                 |                                               |                     | Figure 4G |
| <i>yw</i> injured, <i>yw</i> uninjured, <i>repoGAL4/UASrbf280</i> injured, <i>repoGAL4/UASrbf280</i> uninjured                                                                                                                                                      |                 |                                               | Levene's test       | p=0.371   |
|                                                                                                                                                                                                                                                                     |                 |                                               | Oneway ANOVA        | p=0.000   |
| <i>yw</i>                                                                                                                                                                                                                                                           | Stabbed (n=22)  | vs. not stabbed (n=20)                        | Student t-test      | p=0.004   |
| <i>repoGAL4/UASrbf280</i>                                                                                                                                                                                                                                           | Stabbed (n=13)  | vs. not stabbed (n=15)                        | Student t-test      | p=0.110   |
| Number of abdominal REPO+ glia -Injury                                                                                                                                                                                                                              |                 |                                               |                     | Figure 5A |
| <i>yw</i>                                                                                                                                                                                                                                                           | Stabbed (n=22)  | vs. not stabbed (n=20)                        | Student t-test      | p=0.004   |
| <i>repoGAL4/UASrbf280</i>                                                                                                                                                                                                                                           | Stabbed (n=15)  | vs. not stabbed (n=13)                        | Student t-test      | p=0.110   |
| <i>repoGAL4/UASnumb</i>                                                                                                                                                                                                                                             | Stabbed (n=14)  | vs. not stabbed (n=20)                        | Student t-test      | p=0.598   |
| <i>pros<sup>voila1</sup>/pros<sup>S044116</sup></i>                                                                                                                                                                                                                 | Stabbed (n=10)  | vs. not stabbed (n=12)                        | Student t-test      | p=0.311   |
| <i>Df(1)Exel7463/pBacwgn<sup>e00637</sup></i>                                                                                                                                                                                                                       | Stabbed (n=12)  | vs. not stabbed (n=9)                         | Student t-test      | p=0.005   |
| <i>dorsal<sup>1</sup>/dorsal<sup>fl</sup></i>                                                                                                                                                                                                                       | Stabbed (n=22)  | vs. not stabbed (n=18)                        | Student t-test      | p=0.064   |
| Number of abdominal REPO+ glia -Wandering stage                                                                                                                                                                                                                     |                 |                                               |                     | Figure 6D |
| <i>yw, pros<sup>voila1</sup>/pros<sup>S044116</sup>, repoGAL4/UASnumb, repoGAL4/UAS UASNotch<sup>ICD</sup></i>                                                                                                                                                      |                 |                                               | Levene's test       | p=0.000   |
| <i>repoGAL4/UASNotch<sup>ICD</sup> UAScyce, pros<sup>S044116</sup> repoGAL4/pros<sup>S044116</sup> UAS UASNotch<sup>ICD</sup></i>                                                                                                                                   |                 |                                               | Kruskal-Wallis test | p=0.000   |
| <i>repoGAL4/ UASNotch<sup>ICD</sup> (n=6)</i>                                                                                                                                                                                                                       | vs.             | <i>yw (n=22)</i>                              | Mann-Whitney U-test | p=0.000   |
| <i>repoGAL4/ UASNotch<sup>ICD</sup> UAScyce (n=5)</i>                                                                                                                                                                                                               | vs.             | <i>repoGAL4/ UASNotch<sup>ICD</sup> (n=6)</i> | Mann-Whitney U-test | p=0.006   |
| <i>pros<sup>S044116</sup> repoGAL4/pros<sup>S044116</sup> UASNotch<sup>ICD</sup> (n=7)</i>                                                                                                                                                                          | vs.             | <i>repoGAL4/ UASNotch<sup>ICD</sup> (n=6)</i> | Mann-Whitney U-test | p=0.032   |
| Number of abdominal EBONY+ IG - Wandering stage                                                                                                                                                                                                                     |                 |                                               |                     | Figure 6E |
| <i>repoGAL4/ UASNotch<sup>ICD</sup> (n=4)</i>                                                                                                                                                                                                                       | vs.             | <i>yw (n=6)</i>                               | Mann-Whitney U-test | p=0.003   |
| Number of mCD8GFP+ IG - Wandering stage                                                                                                                                                                                                                             |                 |                                               |                     | Figure 6F |
| <i>UASmCD8GFP/+;almGAL4/UASNotch<sup>ICD</sup> (n=6)</i>                                                                                                                                                                                                            | vs.             | <i>UASmCD8GFP/+;almGAL4/+ (n=7)</i>           | Student t-test      | p=0.003   |
| Number of abdominal REPO+ glia -wandering stage                                                                                                                                                                                                                     |                 |                                               |                     | Figure 6G |
| <i>tubGAL80ts/UASpros;repoGAL4/+ (n=6)</i>                                                                                                                                                                                                                          | vs.             | <i>tubGAL80ts/+;repoGAL4/+ (n=6)</i>          | Student t-test      | p=0.000   |
| Number of abdominal REPO+ glia - Wandering stage                                                                                                                                                                                                                    |                 |                                               |                     | Figure 8C |
| <i>yw, pros<sup>voila1</sup>/pros<sup>S044116</sup>, eiger1, dorsal<sup>1</sup>/dorsal<sup>fl</sup>, UASdTraf2/+;repoGAL4/+;UASdTraf2/+;dorsal<sup>1</sup>/dorsal<sup>fl</sup>;repoGAL4/+; UASdTraf2/+; pros<sup>S044116</sup> repoGAL4/ pros<sup>S044116</sup></i> |                 |                                               | Levene's test       | p=0.687   |
|                                                                                                                                                                                                                                                                     |                 |                                               | Oneway ANOVA        | p=0.000   |
| <i>UASdTraf2/+;repoGAL4/+ (n=6)</i>                                                                                                                                                                                                                                 | vs.             | <i>yw (n=22)</i>                              | Student t-test      | p=0.000   |
| <i>UASdTraf2/+;pros<sup>S044116</sup> repoGAL4/pros<sup>S044116</sup> (n=6)</i>                                                                                                                                                                                     | vs.             | <i>UASdTraf2/+;repoGAL4/+ (n=6)</i>           | Student t-test      | p=0.000   |
| <i>UASdTraf2/+; dorsal<sup>1</sup>/dorsal<sup>fl</sup>;repoGAL4/+ (n=6)</i>                                                                                                                                                                                         | vs.             | <i>UASdTraf2/+;repoGAL4/+ (n=6)</i>           | Student t-test      | p=0.003   |
| Area occupied by glial wound (measured on EBONY) -Injury                                                                                                                                                                                                            |                 |                                               |                     | Figure 9C |
| <i>egr<sup>1</sup>;pros<sup>voila1</sup>/pros<sup>S044116</sup> (n=10)</i>                                                                                                                                                                                          | vs.             | <i>yw (n=22)</i>                              | Student t-test      | p=0.019   |
| Area occupied by glial wound (measured on GS2) -Injury                                                                                                                                                                                                              |                 |                                               |                     | Figure 9D |
| <i>yw, repoGAL4/UASNotch<sup>ICD</sup>, pros<sup>S044116</sup> repoGAL4/pros<sup>S044116</sup> UAS UASNotch<sup>ICD</sup></i>                                                                                                                                       |                 |                                               | Levene's test       | p=0.001   |
|                                                                                                                                                                                                                                                                     |                 |                                               | Kruskal-Wallis test | P=0.001   |
| <i>repoGAL4/UASNotch<sup>ICD</sup> (n=12)</i>                                                                                                                                                                                                                       | vs.             | <i>yw (n=12)</i>                              | Mann-Whitney U-test | p=0.000   |
| <i>pros<sup>S044116</sup> repoGAL4/pros<sup>S044116</sup> UASNotch<sup>ICD</sup> (n=7)</i>                                                                                                                                                                          | vs.             | <i>repoGAL4/UASNotch<sup>ICD</sup> (n=12)</i> | Mann-Whitney U-test | p=0.017   |
| Number of abdominal ACTIVE CASPASE 3+ cells -Injury                                                                                                                                                                                                                 |                 |                                               |                     | Figure 9E |
| <i>yw</i> injured, <i>yw</i> uninjured <i>repoGAL4/UASNotch<sup>ICD</sup> stabbed, repoGAL4/UASNotch<sup>ICD</sup> not stabbed,</i>                                                                                                                                 |                 |                                               | Levene's test       | p=0.332   |
|                                                                                                                                                                                                                                                                     |                 |                                               | Oneway ANOVA        | p=0.000   |
| <i>yw</i>                                                                                                                                                                                                                                                           | Stabbed (n=8)   | vs. not stabbed (n=8)                         | Student t-test      | p=0.000   |
| <i>repoGAL4/UASNotch<sup>ICD</sup></i>                                                                                                                                                                                                                              | stabbed (n=8)   | vs. <i>yw</i> stabbed (n=7)                   | Student t-test      | p=0.002   |

|                                                                                                                                                                      |                         |     |                                                                |                     |                                                            |
|----------------------------------------------------------------------------------------------------------------------------------------------------------------------|-------------------------|-----|----------------------------------------------------------------|---------------------|------------------------------------------------------------|
| <b>% of abdominal BrdU+ Ebony+ over Ebony+ -Injury</b>                                                                                                               |                         |     |                                                                |                     | MS                                                         |
| <i>yw</i>                                                                                                                                                            | Stabbed (n=10)          | vs. | not stabbed (n=9)                                              | Mann-Whitney U-test | p=0.034                                                    |
| <b>Number of abdominal histoneYFP+ IG -Injury</b>                                                                                                                    |                         |     |                                                                |                     | MS                                                         |
| <i>alrmGAL4/UAShistoneYFP</i><br>; <i>pros</i> <sup>S044116</sup> / <i>pros</i> <sup>S044116</sup>                                                                   | Stabbed<br>(68.8, n=13) | vs. | not stabbed<br>(81.8, n=8)                                     | Student t-test      | p=0.007                                                    |
| <b>Number of intense DORSAL+ EBONY+ IG -Injury</b>                                                                                                                   |                         |     |                                                                |                     | MS                                                         |
| <i>yw</i>                                                                                                                                                            | Stabbed (50%, n=10)     | vs. | not stabbed (0%, n=9)                                          | Fisher's Exact test | p=0.033                                                    |
| <i>egr<sup>1</sup></i>                                                                                                                                               | Stabbed (0%, n=10)      | vs. | <i>yw</i> Stabbed (50%, n=10)                                  | Fisher's Exact test | p=0.033                                                    |
| <b>Number of DAP+ EBONY+ IG in a segment</b>                                                                                                                         |                         |     |                                                                |                     | MS                                                         |
| <i>tubGAL80ts/+; repoGAL4/+</i>                                                                                                                                      | (n=10)                  | vs. | <i>tubGAL80ts/+; repoGAL4/+</i>                                | (n=6)               | Mann-Whitney U-test<br>p=0.016                             |
| <b>Number of abdominal EBONY+ IG - Wandering stage</b>                                                                                                               |                         |     |                                                                |                     | MS                                                         |
| <i>UASdTraf2/+; repoGAL4/+</i>                                                                                                                                       | (87.1, n=7)             | vs. | <i>yw</i>                                                      | (84.1, n=12)        | Student t-test<br>p=0.001                                  |
| <b>Number of abdominal EBONY+ IG - Wandering stage</b>                                                                                                               |                         |     |                                                                |                     | Text S1                                                    |
| <i>tubGAL80ts/+; repoGAL4/UAScycE</i>                                                                                                                                | (89.9, n=7)             | vs. | <i>yw</i>                                                      | (81.3, n=4)         | Student t-test<br>P=0.006                                  |
| <b>Number of abdominal EBONY+ BrdU+ IG</b>                                                                                                                           |                         |     |                                                                |                     | Supplementary Figure 3D                                    |
| <i>tubGAL80ts/+; repoGAL4/UAScycE</i>                                                                                                                                | (n=13)                  | vs. | <i>yw</i>                                                      | (n=12)              | Student t-test<br>p=0.001                                  |
| <b>Number of abdominal REPO+ glia -96h AEL</b>                                                                                                                       |                         |     |                                                                |                     | Supplementary Figure 10A                                   |
| <i>pros</i> <sup>voila1</sup> / <i>pros</i> <sup>S04411</sup>                                                                                                        | (n=6)                   | vs. | <i>yw</i>                                                      | (n=7)               | Student t-test<br>p=0.000                                  |
| <b>Number of abdominal REPO+ glia -Wandering stage</b>                                                                                                               |                         |     |                                                                |                     | Supplementary Figure 10A                                   |
| <i>pros</i> <sup>voila1</sup> / <i>pros</i> <sup>S044116</sup>                                                                                                       | (n=22)                  | vs. | <i>yw</i>                                                      | (n=22)              | Student t-test<br>p=0.542                                  |
| <b>Number of abdominal REPO+ glia - Culture</b>                                                                                                                      |                         |     |                                                                |                     | Supplementary Figure 10B                                   |
| <i>yw, pros</i> <sup>voila1</sup> / <i>pros</i> <sup>S044116</sup> ,<br><i>pros</i> <sup>S044116</sup> / <i>repoGAL4 /pros</i> <sup>S044116</sup> / <i>UASrbf280</i> |                         |     |                                                                |                     | Levene's test<br>Kruskal-Wallis test<br>p=0.004<br>p=0.000 |
| <i>pros</i> <sup>voila1</sup> / <i>pros</i> <sup>S044116</sup>                                                                                                       | (n=12)                  | vs. | <i>yw</i>                                                      | (n=20)              | Mann-Whitney U-test<br>p=0.000                             |
| <i>pros</i> <sup>S044116</sup> / <i>repoGAL4/pros</i> <sup>S044116</sup> / <i>UASrbf280</i>                                                                          | (n=13)                  | vs. | <i>pros</i> <sup>voila1</sup> / <i>pros</i> <sup>S044116</sup> | (n=12)              | Mann-Whitney U-test<br>p=0.000                             |
| <b>Number of PCNAGFP+ enwrapping glia in a segment</b>                                                                                                               |                         |     |                                                                |                     | Supplementary Figure 10E                                   |
| <i>PCNAGFP/+; hsGAL4/UASNotch<sup>ICD</sup></i>                                                                                                                      | heatshocked (n=8)       | vs. | not heatshocked                                                | (n=11)              | Student t-test<br>p=0.000                                  |
| <b>Number of abdominal EBONY + BrdU IG</b>                                                                                                                           |                         |     |                                                                |                     | Supplementary Figure 10G                                   |
| <i>hsGAL4/UASNotch<sup>ICD</sup></i>                                                                                                                                 | (n=10)                  | vs. | <i>hsGAL4/+</i>                                                | (n=7)               | Student t-test<br>p=0.014                                  |
| <b>Number of abdominal EBONY+ IG - Wandering stage</b>                                                                                                               |                         |     |                                                                |                     | Supplementary Figure 11F                                   |
| <i>yw, pros</i> <sup>voila1</sup> / <i>pros</i> <sup>S044116</sup> , <i>repoGAL4/UASnumb, repoGAL4/UASNotch<sup>ICD</sup></i>                                        |                         |     |                                                                |                     | Levene's test<br>Kruskal-Wallis test<br>p=0.000<br>p=0.000 |
| <i>pros</i> <sup>voila1</sup> / <i>pros</i> <sup>S044116</sup>                                                                                                       | (n=4)                   | vs. | <i>yw</i>                                                      | (n=12)              | Mann-Whitney U-test<br>p=0.003                             |
| <i>repoGAL4/ UASNotch<sup>ICD</sup></i>                                                                                                                              | (n=4)                   | vs. | <i>yw</i>                                                      | (n=6)               | Mann-Whitney U-test<br>p=0.003                             |
| <b>Number of abdominal EBONY + BrdU IG</b>                                                                                                                           |                         |     |                                                                |                     | Supplementary Figure 15B                                   |
| <i>UASdTraf2/+; hsGAL4/+</i>                                                                                                                                         | (n=9)                   | vs. | <i>hsGAL4/+</i>                                                | (n=7)               | Student t-test<br>p=0.000                                  |

White writing on black background indicates experiment; black writing on grey background indicates tests applied to multiple genotypes within one experiment; black on white background is for pair-wise comparisons. Test genotypes are on the left, compared to the control genotypes on the right. For multiple comparisons, One Way Anova and Kruskal-Wallis tests were used; for pair-wise comparisons, Fisher's exact, Mann-Whitney-U and Student-t tests were applied. For sample sizes, see figures.
